# Supplementary material for: Amphiphilic poly(N-vinyl pyrrolidone) grafted graphene by reversible addition and fragmentation polymerization and the reinforcement of poly(vinyl acetate) films
Source: Royal Society of Chemistry journal article supplement (doi:10.1039/c3ta11853c), 2013-01-01
Supplement: c3ta11853c.pdf [file c3ta11853c.pdf]

## Supplementary Information

### **Amphiphilic Poly(N-vinyl Pyrrolidone) Grafted Graphene by Reversible Addition and Fragmentation Polymerization: Reinforcement of Poly(vinyl acetate) Films**

Rama K. Layek, Atanu Kuila, Dhruva P. Chatterjee and Arun K. Nandi\*

Polymer Science Unit,

Indian Association for the Cultivation of Science,

Jadavpur, Kolkata – 700032

INDIA.

\* For correspondence : A.K.Nandi, email : [psuakn@iacs.res.in](mailto:psuakn@iacs.res.in)

**SI Table 1. Hansen solubility parameters of different solvents**

| <b>Solvent</b>          | <b><math>\delta_P</math></b> | <b><math>\delta_H</math></b> | <b><math>\delta_P + \delta_H</math></b> |
|-------------------------|------------------------------|------------------------------|-----------------------------------------|
| <b>Hexane</b>           | <b>0</b>                     | <b>0</b>                     | <b>0</b>                                |
| <b>Petroleum ether</b>  | <b>0</b>                     | <b>0</b>                     | <b>0</b>                                |
| <b>CCl<sub>4</sub></b>  | <b>0</b>                     | <b>0.6</b>                   | <b>0.6</b>                              |
| <b>Benzene</b>          | <b>0</b>                     | <b>2.0</b>                   | <b>2.0</b>                              |
| <b>Toluene</b>          | <b>1.4</b>                   | <b>2.0</b>                   | <b>3.4</b>                              |
| <b>Xylene</b>           | <b>1</b>                     | <b>3.1</b>                   | <b>4.2</b>                              |
| <b>Chlorobenzene</b>    | <b>4.3</b>                   | <b>2.0</b>                   | <b>6.3</b>                              |
| <b>Diethyl ether</b>    | <b>2.9</b>                   | <b>5.1</b>                   | <b>8.0</b>                              |
| <b>CHCl<sub>3</sub></b> | <b>3.1</b>                   | <b>5.7</b>                   | <b>8.8</b>                              |
| <b>1,4-dioxane</b>      | <b>1.8</b>                   | <b>7.4</b>                   | <b>9.2</b>                              |
| <b>Dichlorobenzene</b>  | <b>6.3</b>                   | <b>3.3</b>                   | <b>9.6</b>                              |
| <b>DCM</b>              | <b>6.3</b>                   | <b>6.1</b>                   | <b>12.4</b>                             |
| <b>Ethyl acetate</b>    | <b>5.3</b>                   | <b>7.2</b>                   | <b>12.5</b>                             |
| <b>THF</b>              | <b>5.7</b>                   | <b>8</b>                     | <b>13.7</b>                             |
| <b>Acetone</b>          | <b>10.4</b>                  | <b>7</b>                     | <b>17.4</b>                             |
| <b>NMP</b>              | <b>12.3</b>                  | <b>7.2</b>                   | <b>19.5</b>                             |
| <b>CH<sub>3</sub>CN</b> | <b>18.0</b>                  | <b>6.1</b>                   | <b>24.1</b>                             |
| <b>DMF</b>              | <b>13.7</b>                  | <b>11.3</b>                  | <b>25</b>                               |
| <b>DMSO</b>             | <b>16.4</b>                  | <b>10.2</b>                  | <b>26.6</b>                             |
| <b>Ethanol</b>          | <b>8.8</b>                   | <b>19.4</b>                  | <b>28.2</b>                             |
| <b>Methanol</b>         | <b>12.3</b>                  | <b>22.3</b>                  | <b>34.6</b>                             |
| <b>Water</b>            | <b>16.0</b>                  | <b>42.3</b>                  | <b>58.3</b>                             |

**SI Table-2. Mechanical properties (stress, strain, modulus and toughness) of PVAc and PVAc / GP nanocomposites at 30<sup>0</sup>C**

| <b>Sample</b> | <b>Strain % at break</b> | <b>Stress at break (MPa)</b> | <b>% Increase of stress at break</b> | <b>Young's modulus (GPa)</b> | <b>% Increase of Young's modulus</b> | <b>Toughness (Nmm)</b> | <b>% increase of toughness</b> |
|---------------|--------------------------|------------------------------|--------------------------------------|------------------------------|--------------------------------------|------------------------|--------------------------------|
| <b>PVAc</b>   | <b>518 ±7.5</b>          | <b>7 ±0.3</b>                | <b>-</b>                             | <b>1.47±0.07</b>             | <b>-</b>                             | <b>241.2±10.5</b>      |                                |
| <b>GP1</b>    | <b>506.6 ±6.1</b>        | <b>13.1 ±.2</b>              | <b>62</b>                            | <b>2.7±0.1</b>               | <b>63</b>                            | <b>461.6±12.8</b>      | <b>91</b>                      |
| <b>GP3</b>    | <b>474 ±5.7</b>          | <b>16.9 ±0.7</b>             | <b>126</b>                           | <b>3.1±0.1</b>               | <b>107</b>                           | <b>511.9±8.6</b>       | <b>112</b>                     |
| <b>GP5</b>    | <b>385.5±5.6</b>         | <b>18.8 ±1.2</b>             | <b>169</b>                           | <b>4.2±0.09</b>              | <b>180</b>                           | <b>449±9.5</b>         | <b>86</b>                      |

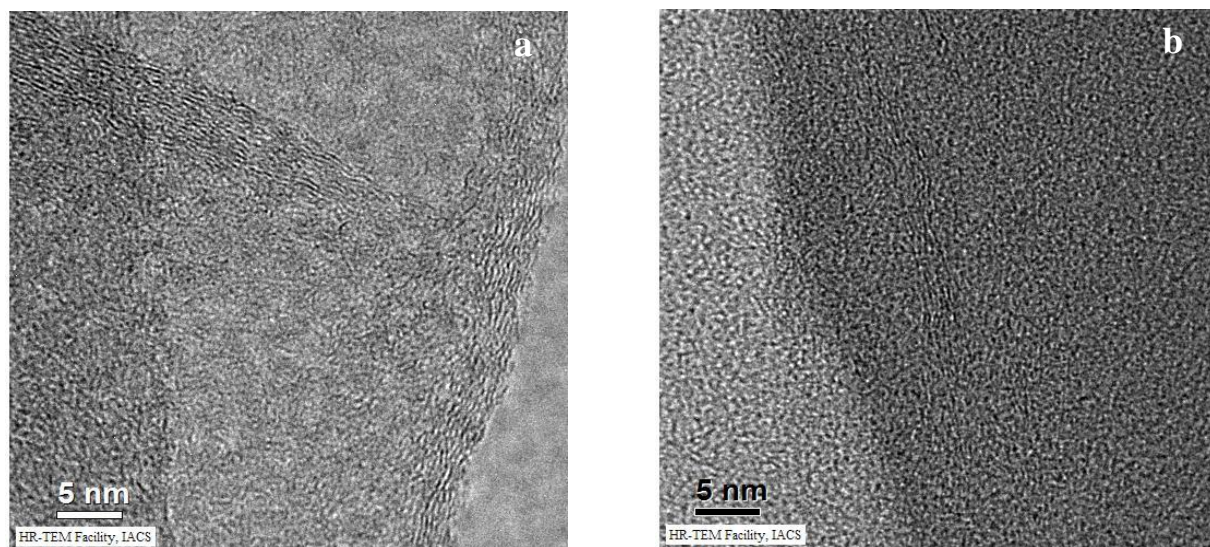

**SI Fig.1** HRTEM images of (a) GO and (b) GP

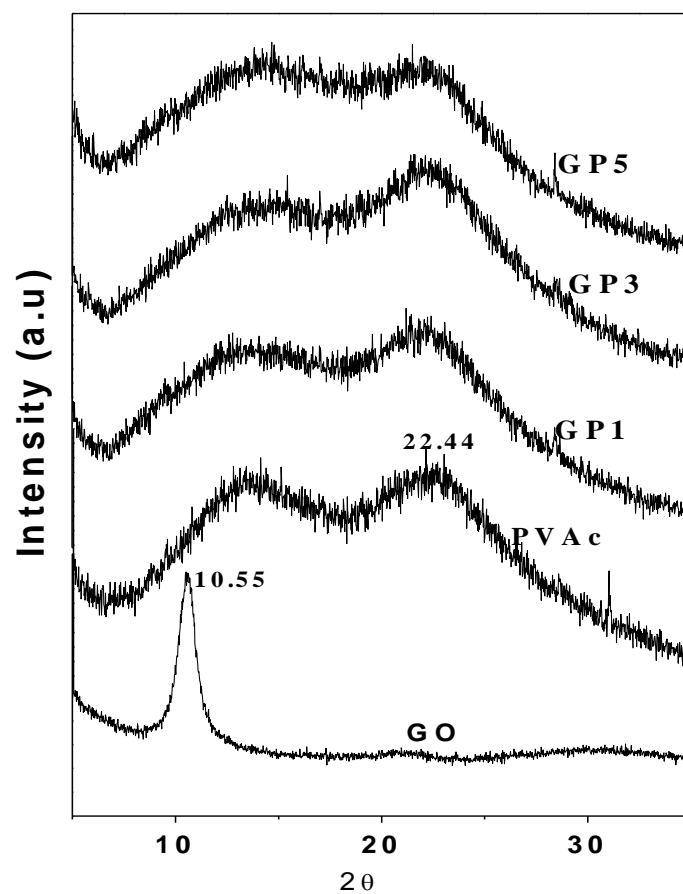

**SI Figure 2.** WAXS pattern of GO, PVAc and its nanocomposite with GP at indicated composition

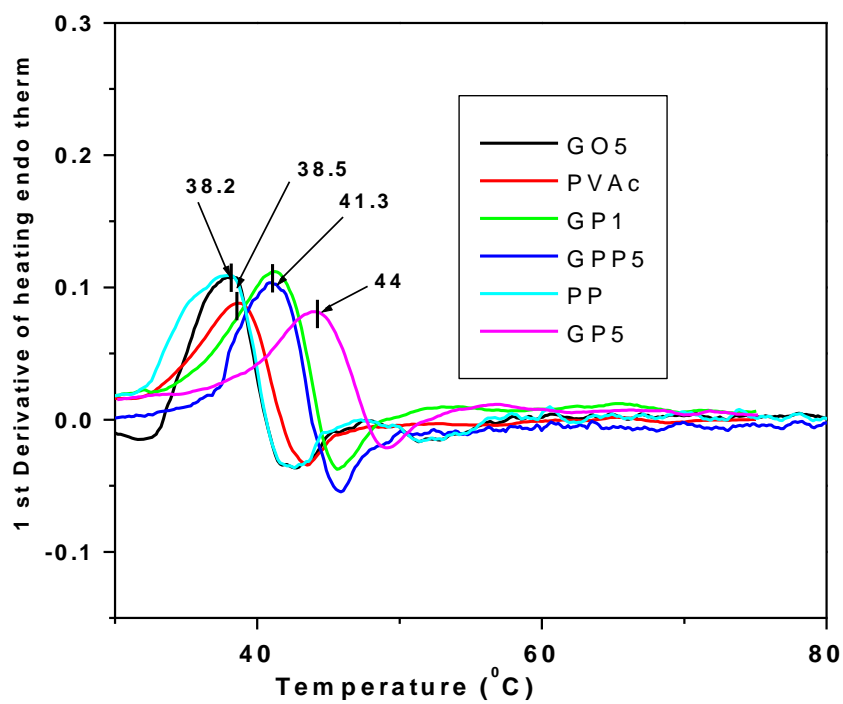

**SI Figure 3.** 1<sup>st</sup> derivative of DSC heating endotherm to obtain glass transition temperature
